# Supplementary material
Source: publisher figshare collection journal article supplement (https://future-science-group.figshare.com/ndownloader/files/28325472)
Supplement: Supplementary file 1 [file 28325472]

***Supporting Information***

**Development and *in vivo* evaluation of fused benzazole analogues of anti-melanoma agent HA15**

***Table of content***

| Spectra Section………………………………………………………………….............. | 2 |
| --- | --- |
| Biology………………………………………………………………………………….. | 30 |

**Spectra Section**

**7a**


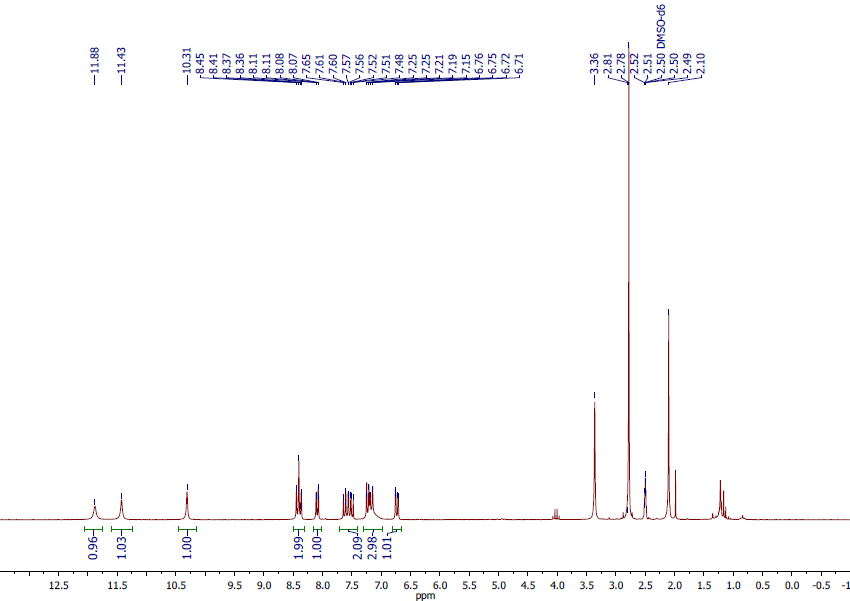


1H NMR spectra of **7a**


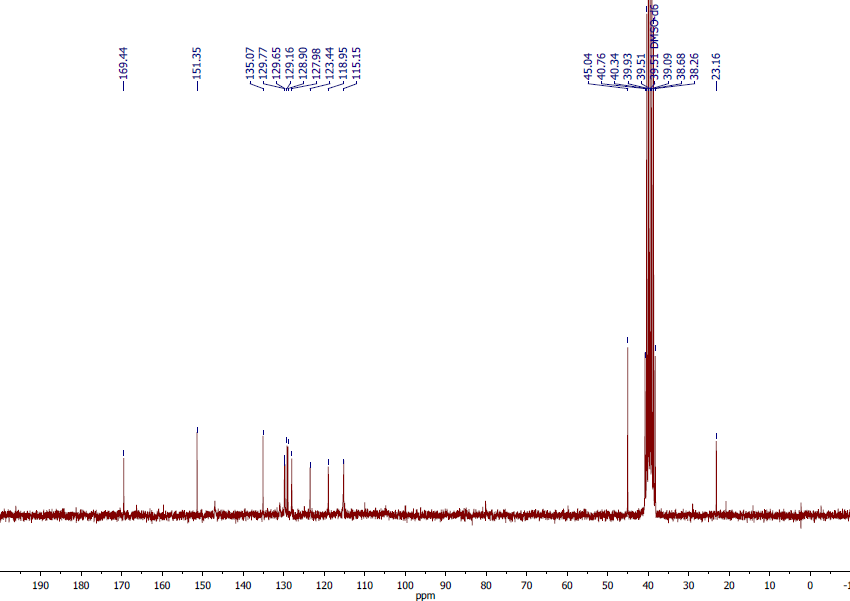


13C NMR spectra of **7a**


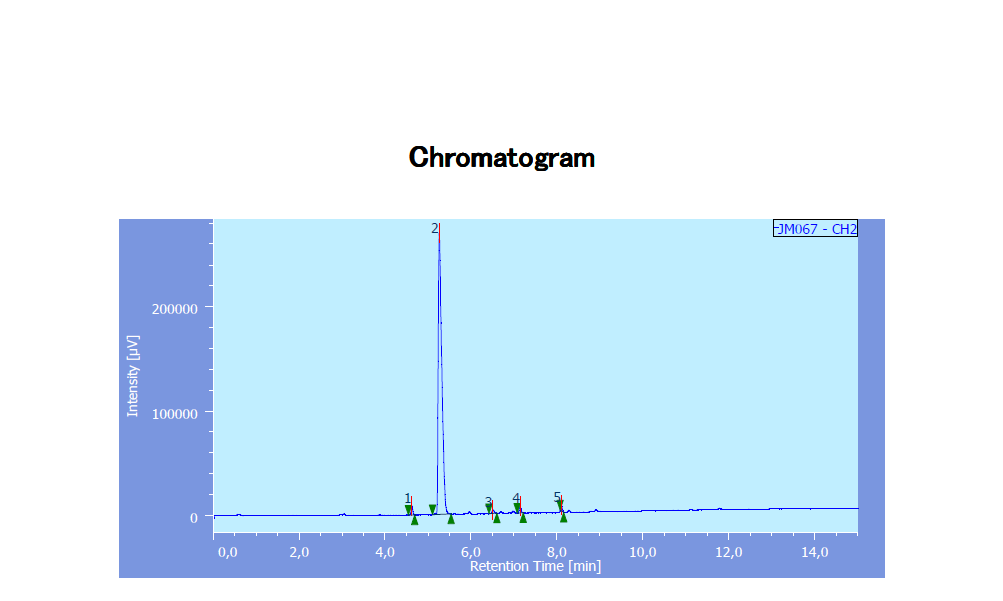


HPLC chromatogram of **7a**.

HRMS spectra of **7a**.

**7b**


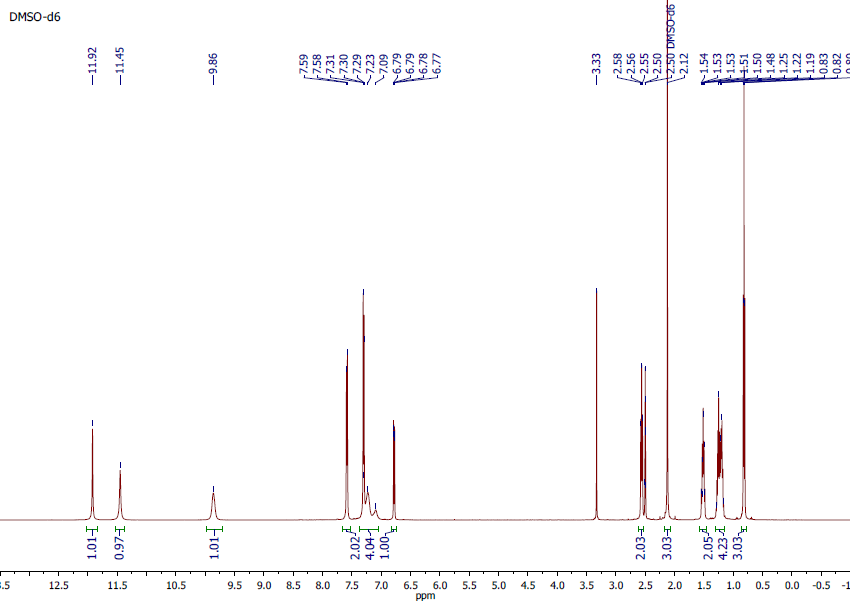


1H NMR spectra of **7b**


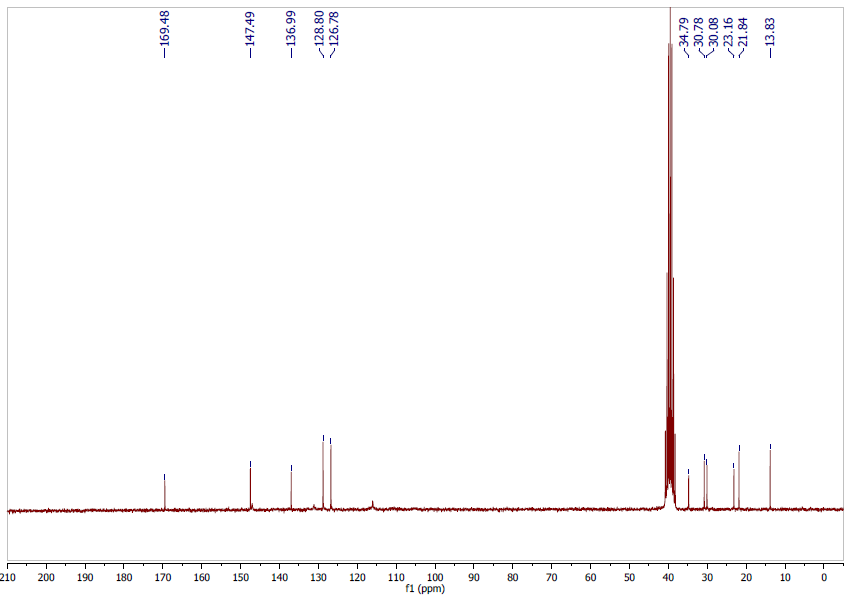


13C NMR spectra of **7b**


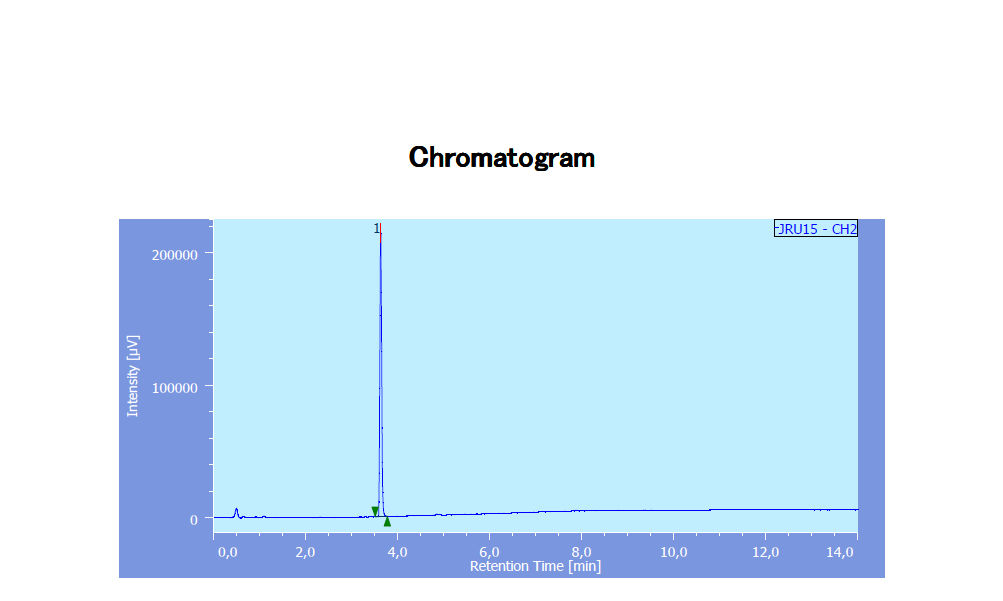


HPLC chromatogram of **7b**.

HRMS spectra of **7b**

**10a**


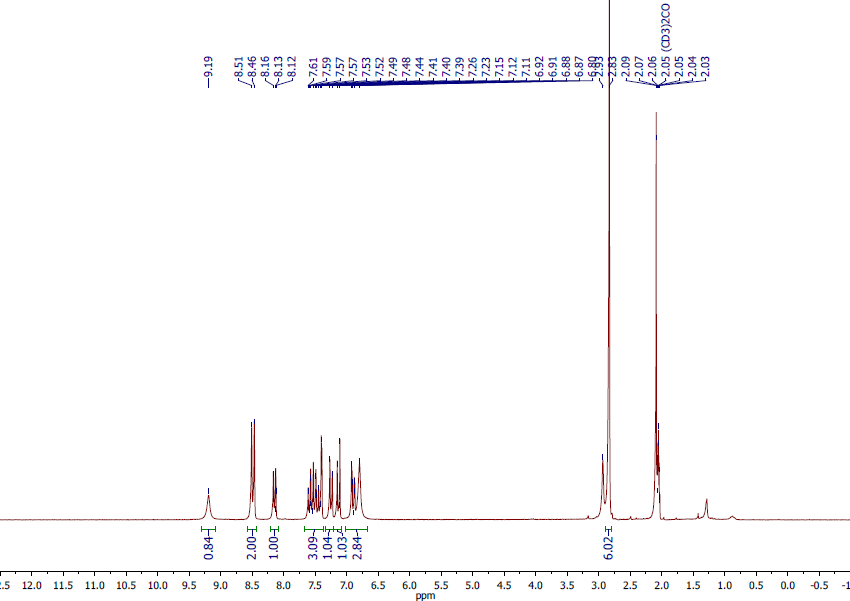


1H NMR spectra of **10a**


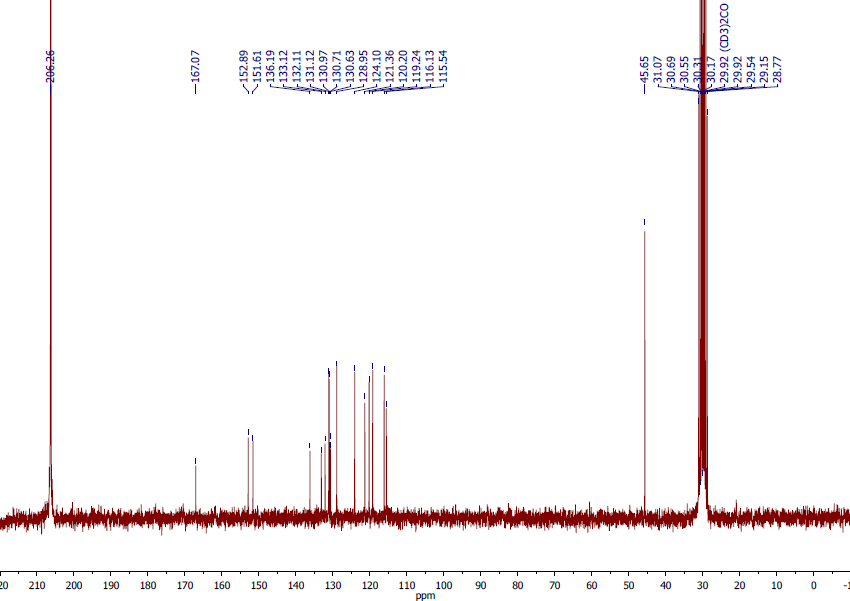


13C NMR spectra of **10a**


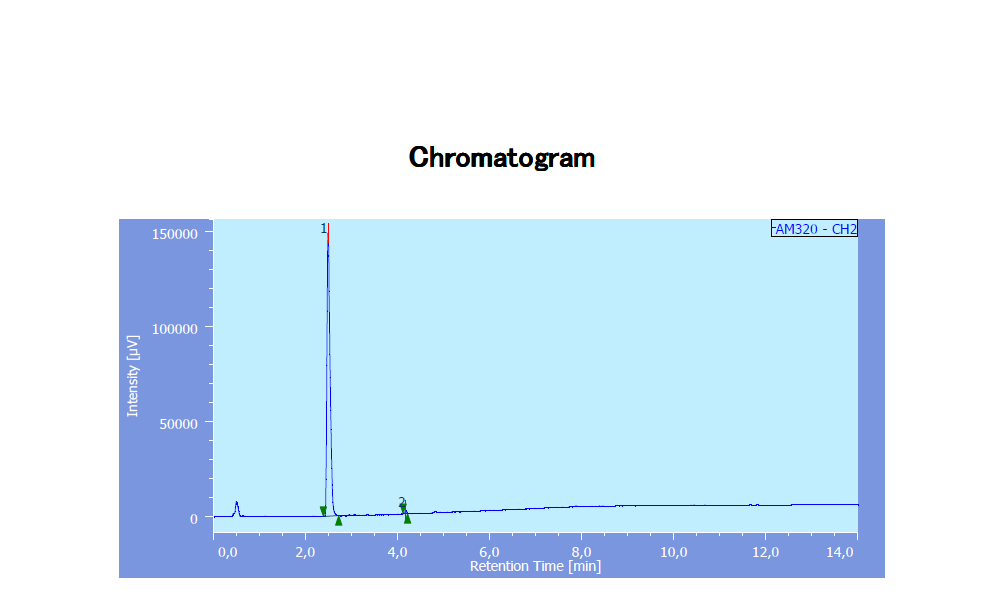


HPLC chromatogram of **10a**

HRMS spectra of **10a**.

**10b**


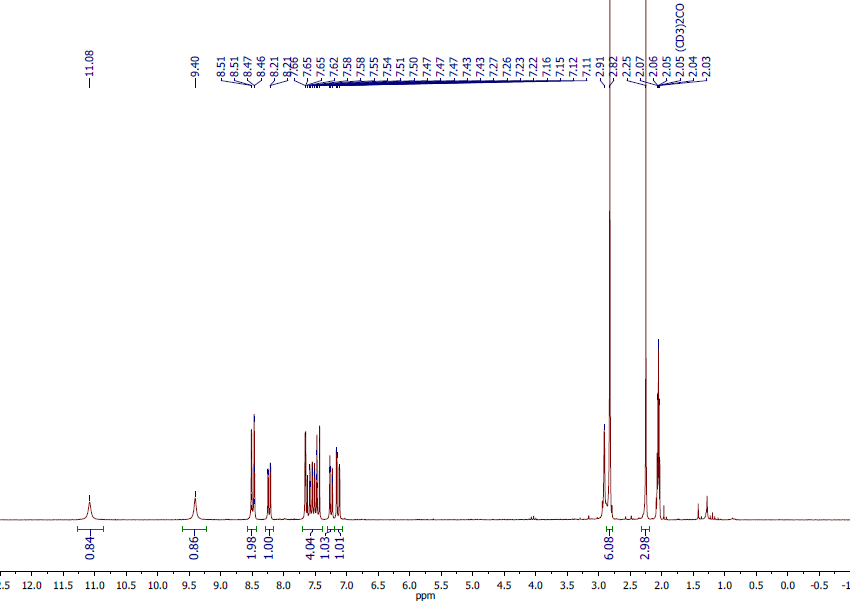


1H NMR spectra of **10b**


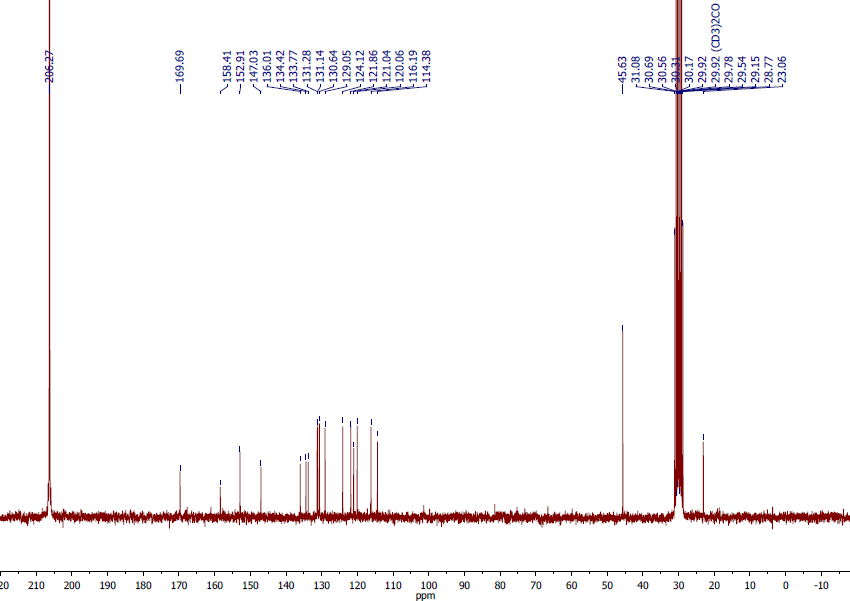


13C NMR spectra of **10b**


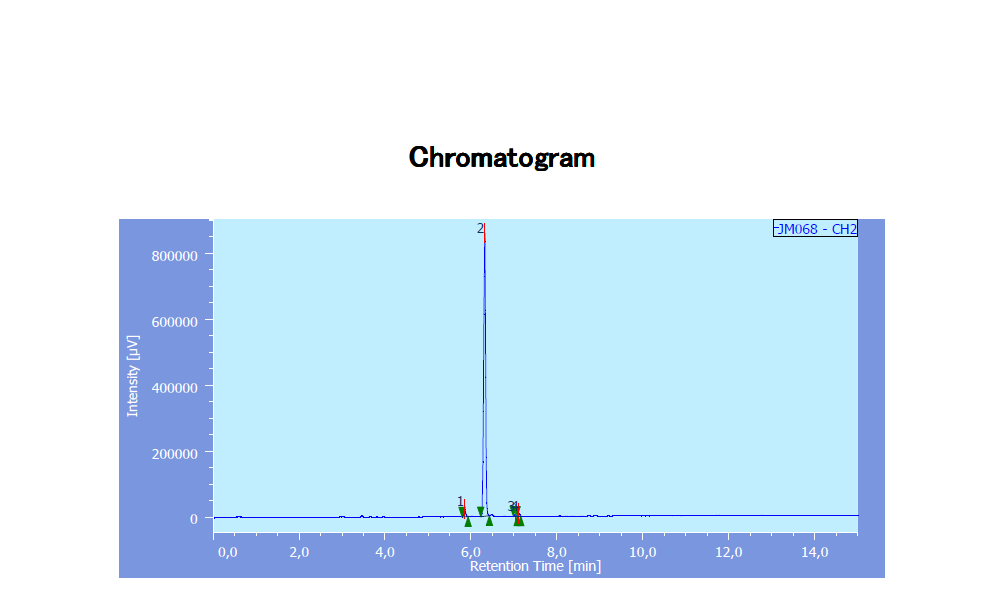


HPLC chromatogram of **10b**

HRMS spectra of **10b**.

**10c**


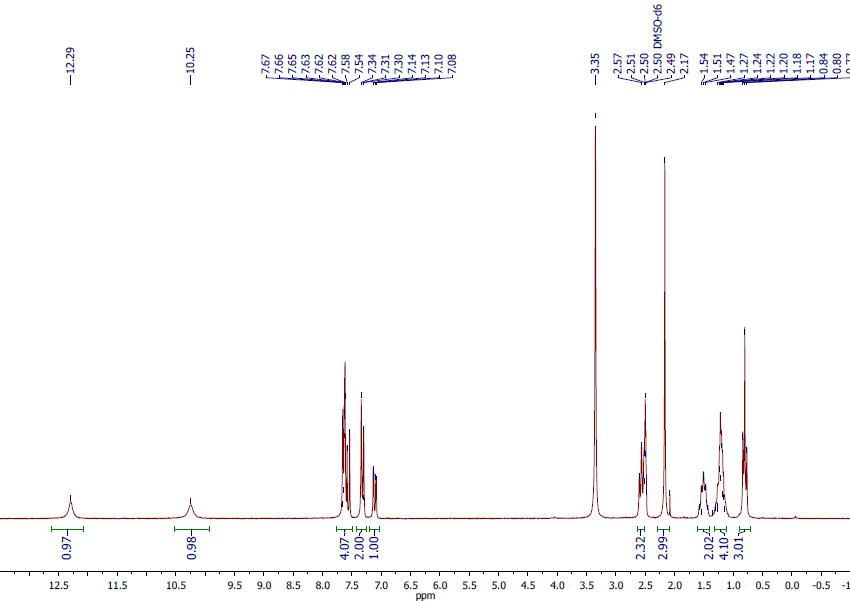


1H NMR spectra of **10c**


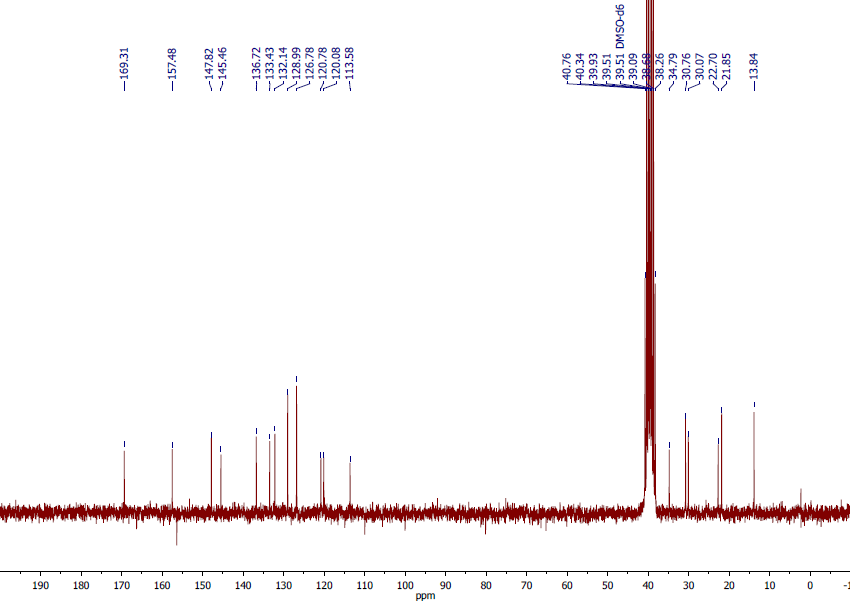


13C NMR spectra of **10c**


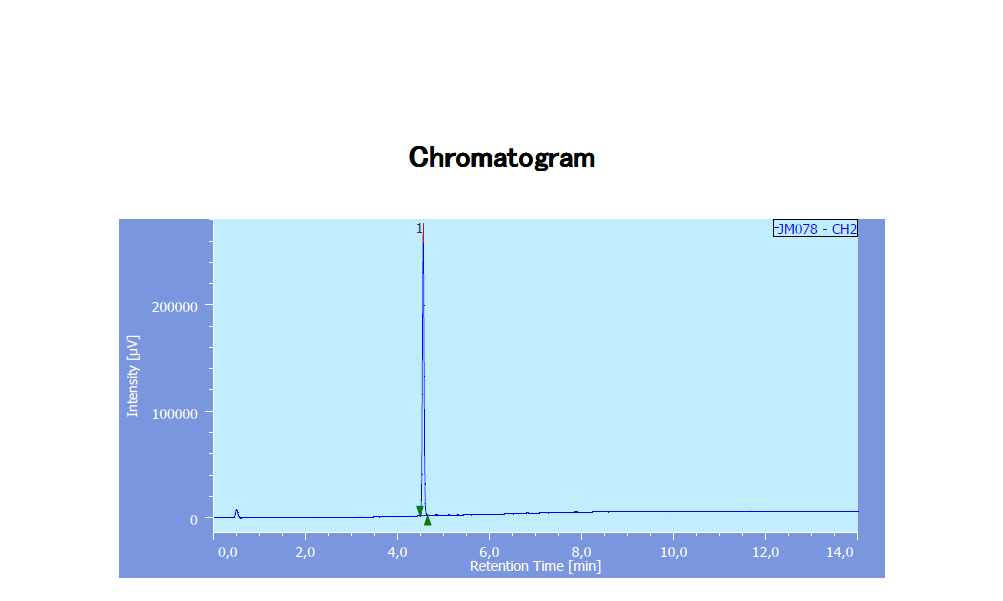


HPLC chromatogram of **10c**.

HRMS spectra of **10c**.

**14a**


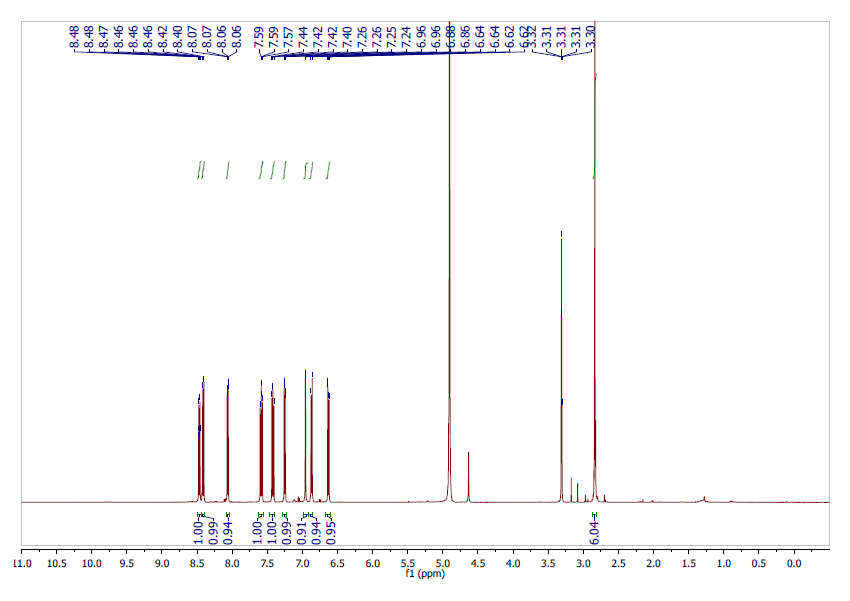


1H NMR spectra of **14a**


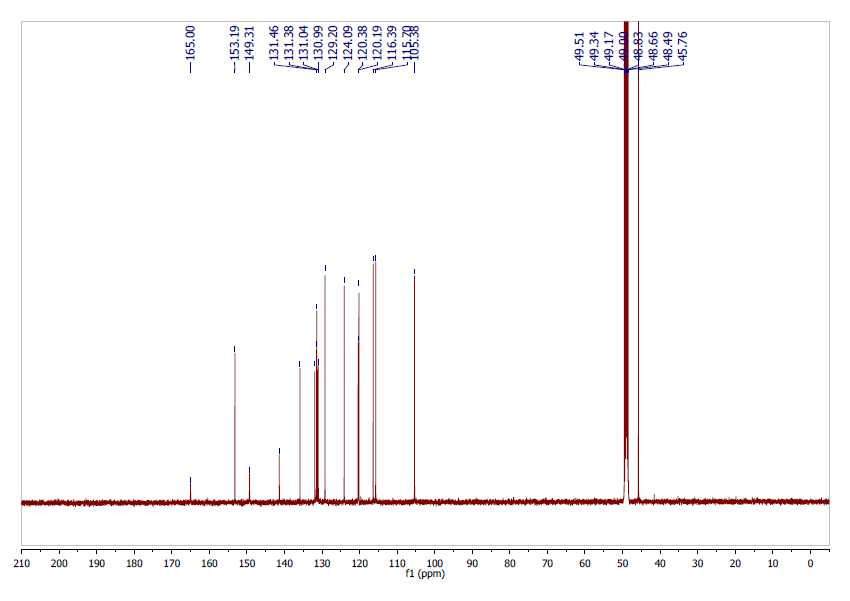


13C NMR spectra of **14a**


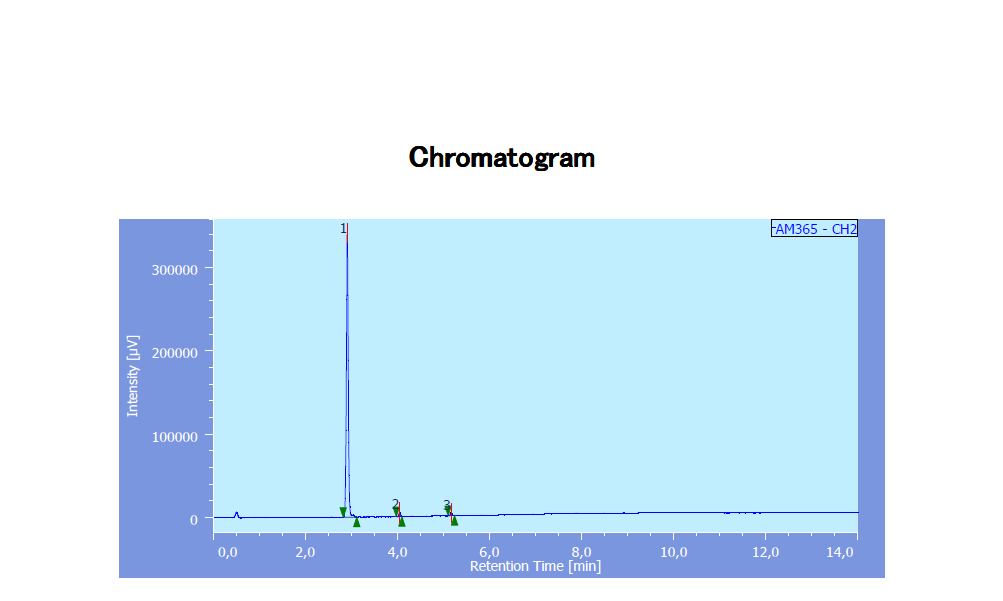


HPLC chromatogram of **14a**.

HRMS spectra of **14a**

**14b**


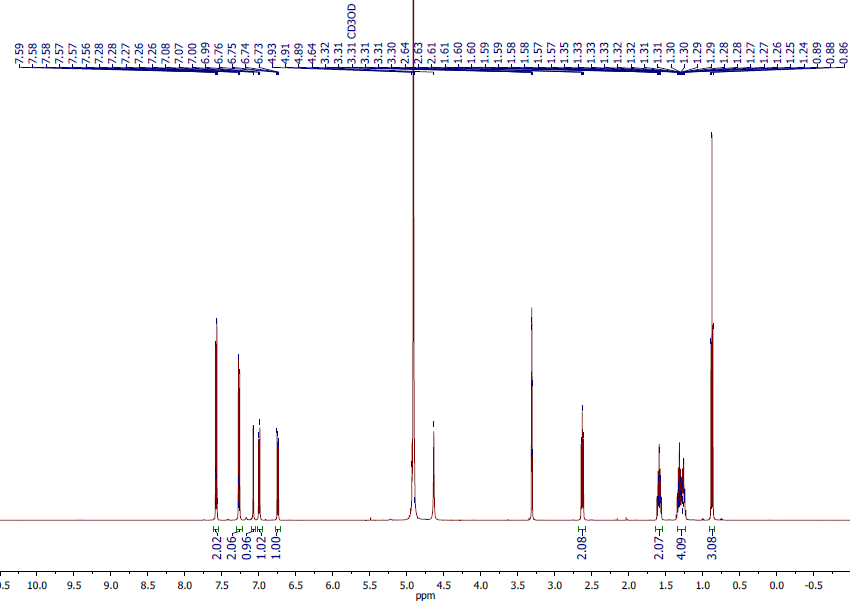


1H NMR spectra of **14b**


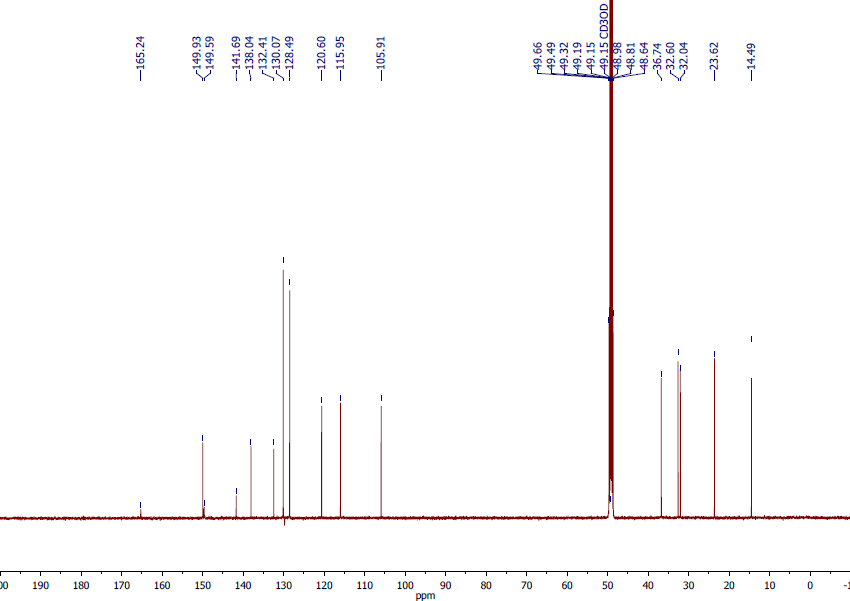


13C NMR spectra of **14b**


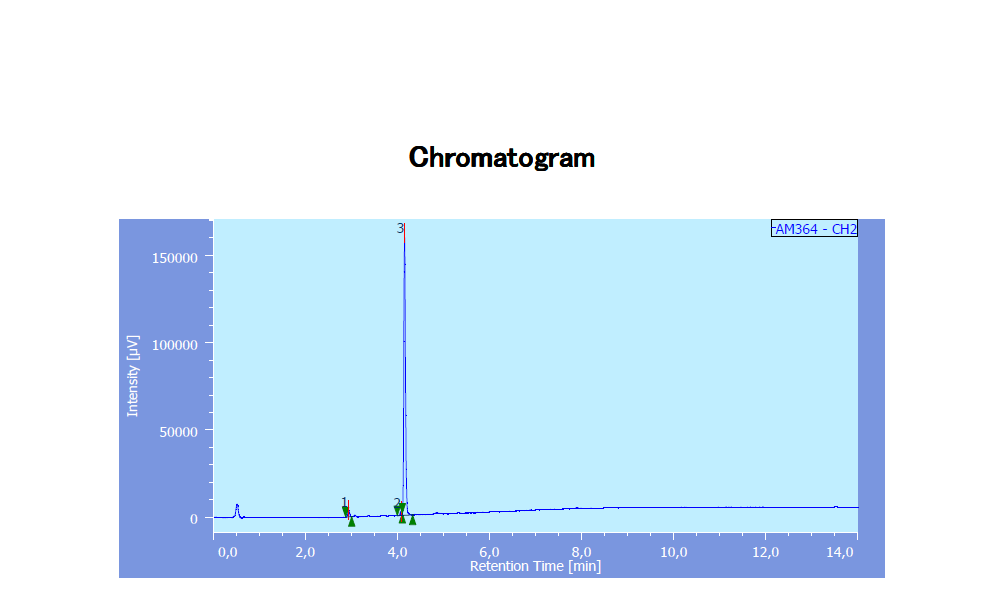


HPLC chromatogram of **14b**

HRMS spectra of **14b**

**15a**


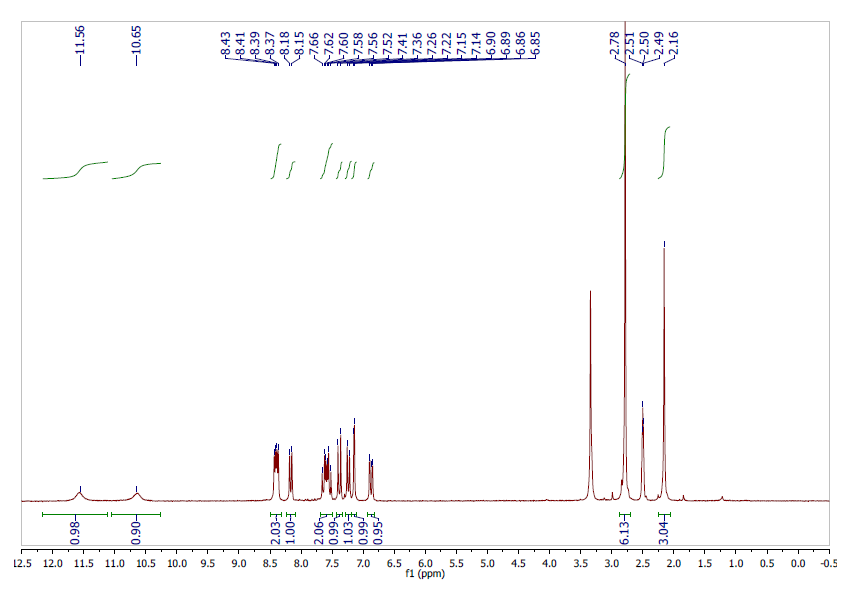


1H NMR spectra of **15a**


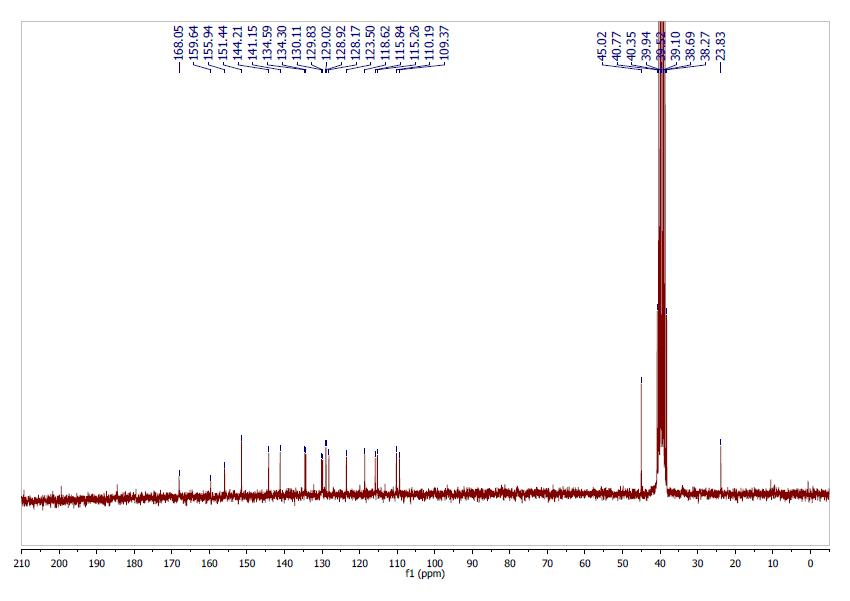


13C NMR spectra of **15a**


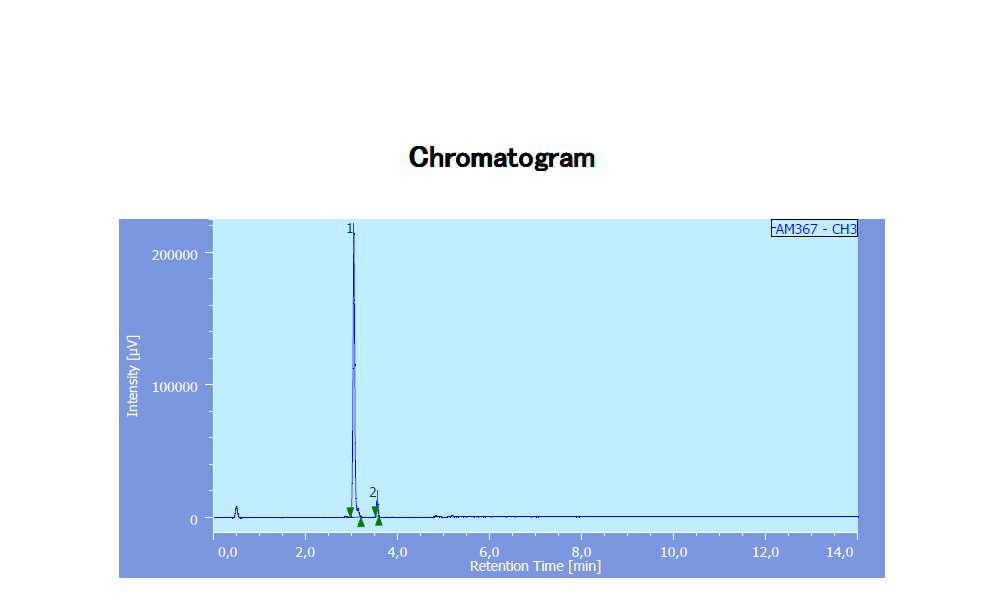


HPLC chromatogram of **15a**.

HRMS spectra of **15a**

**15b**


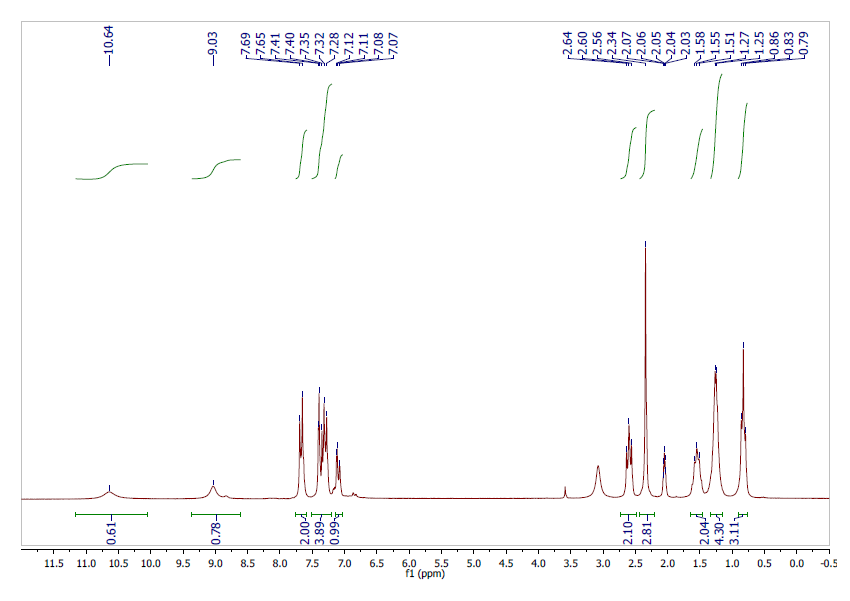


1H NMR spectra of **15b**


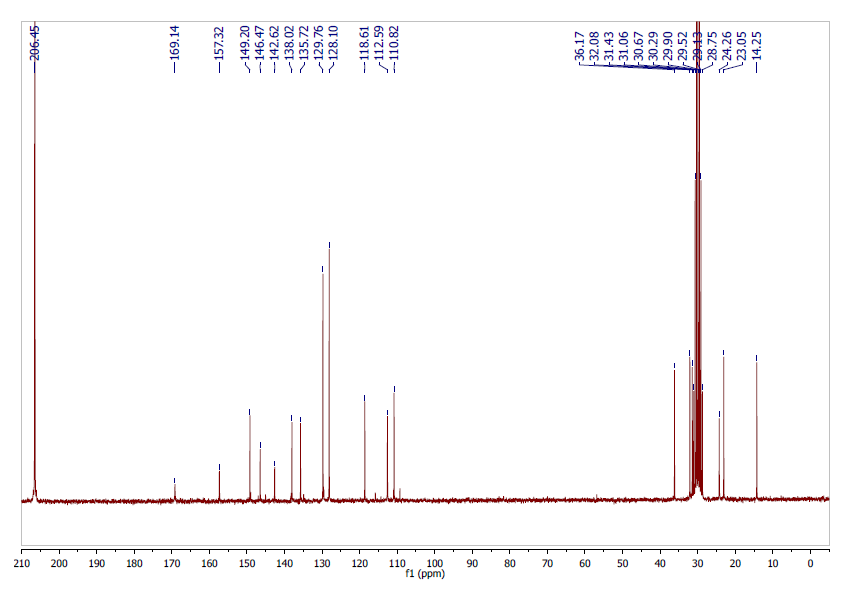


13C NMR spectra of **15b**


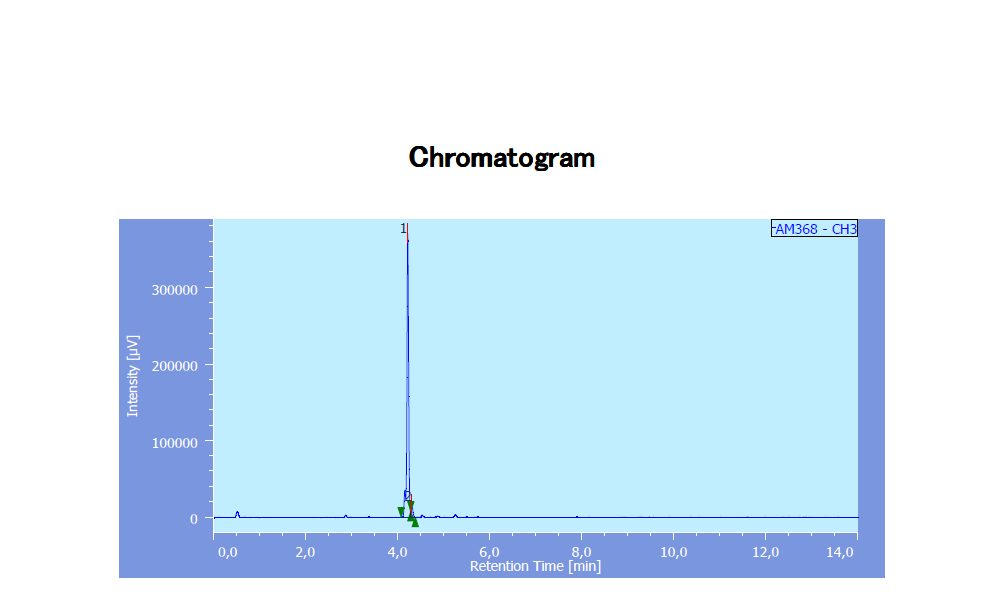


HPLC chromatogram of **15b**.

HRMS spectra of **15b**

**18a**


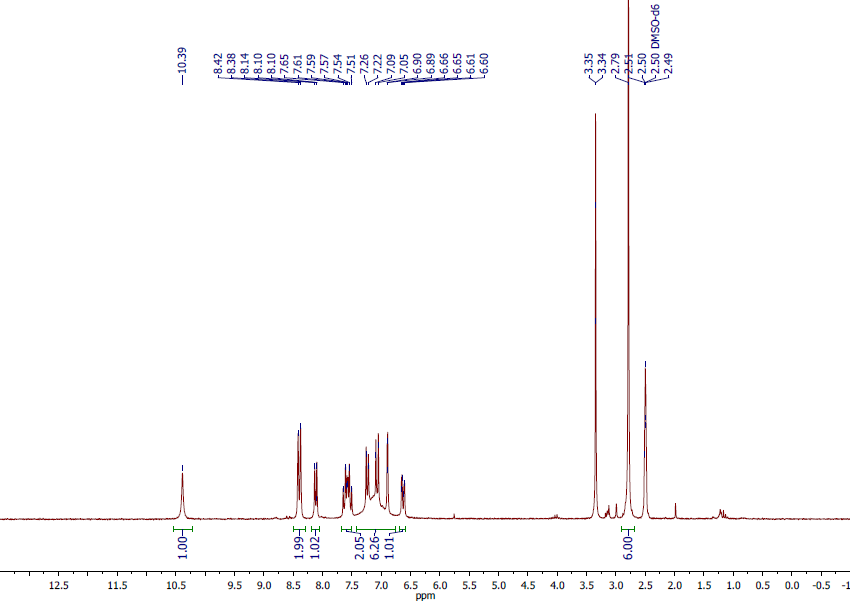


1H NMR spectra of **18a**


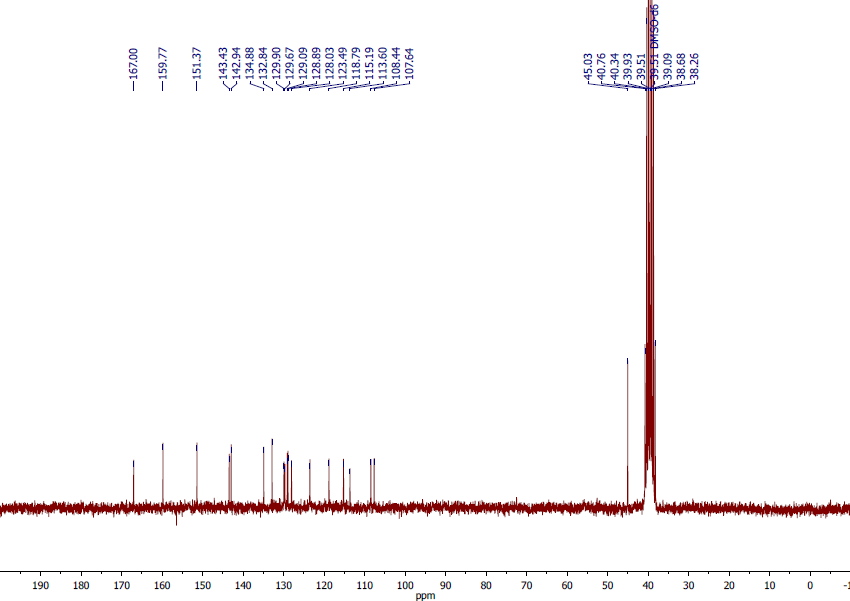


13C NMR spectra of **18a**


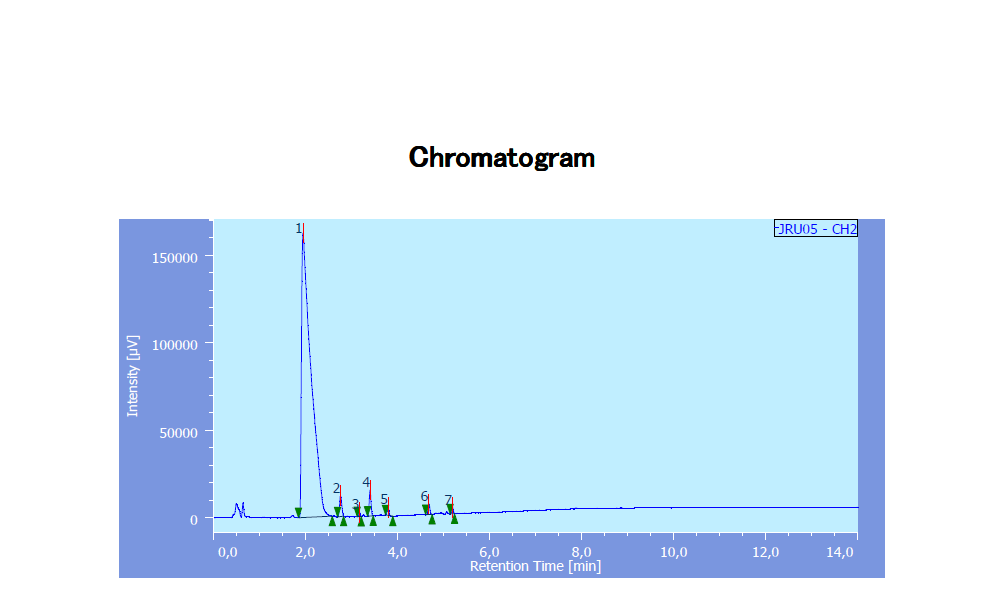


HPLC chromatogram of **18a**

HRMS spectra of **18a**

**18b**


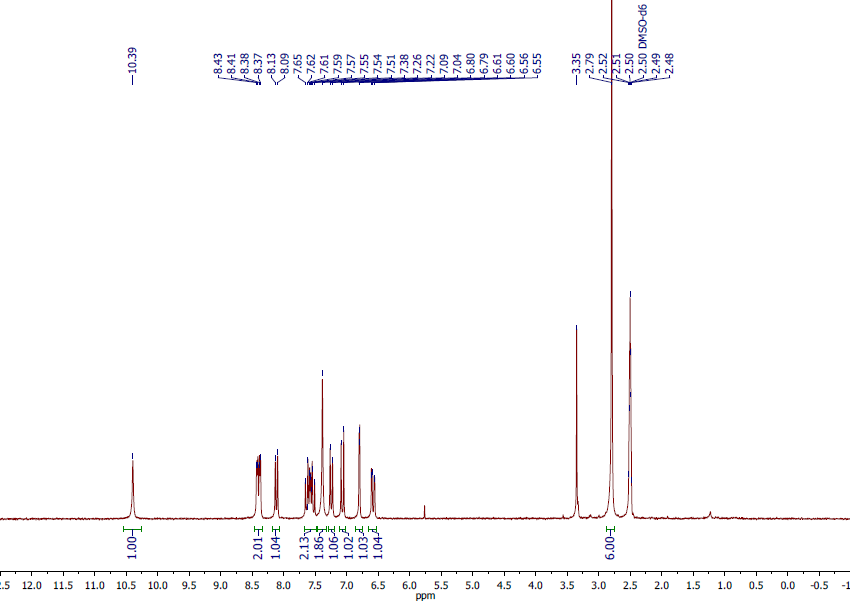


1H NMR spectra of **18b**


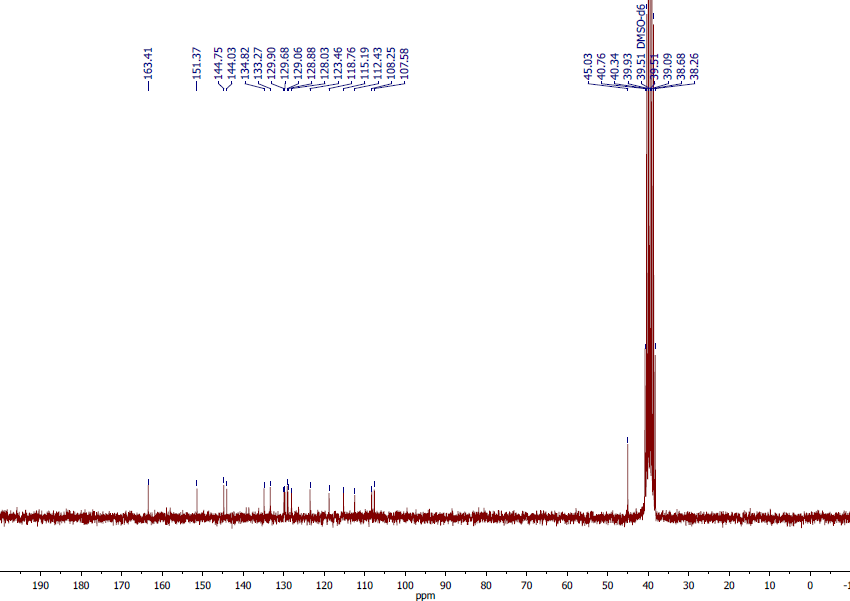


13C NMR spectra of **18b**


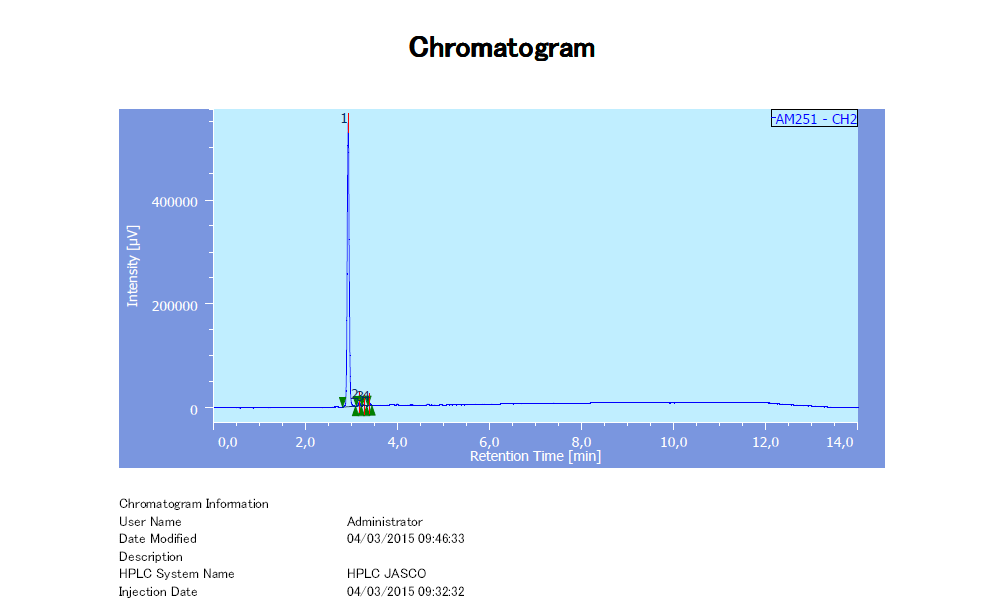


HPLC chromatogram of **18b**

HRMS spectra of **18b**

**18c**


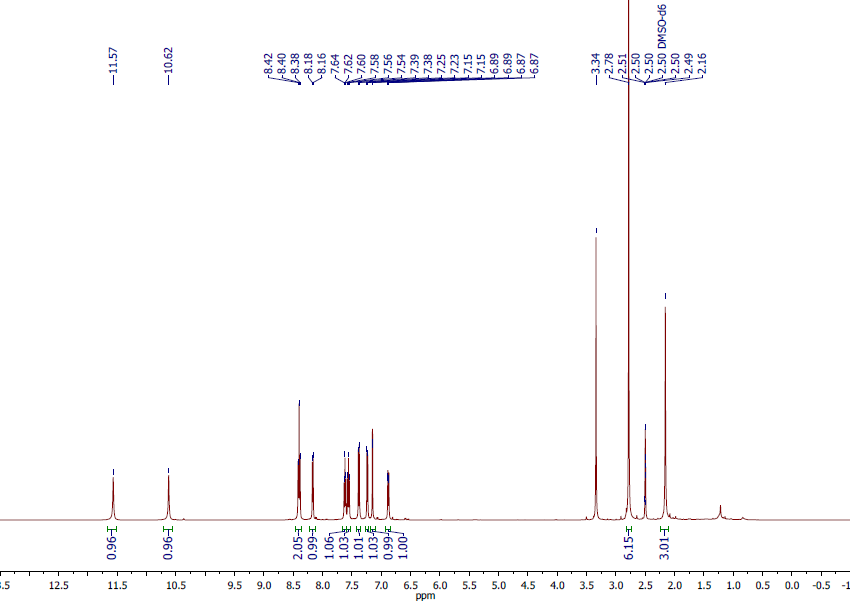


1H NMR spectra of **18c**


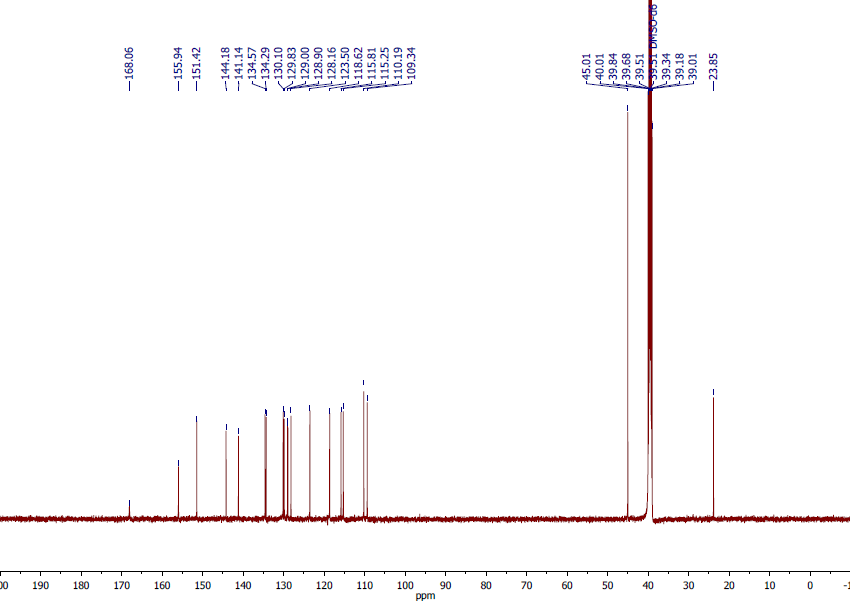


13C NMR spectra of **18c**


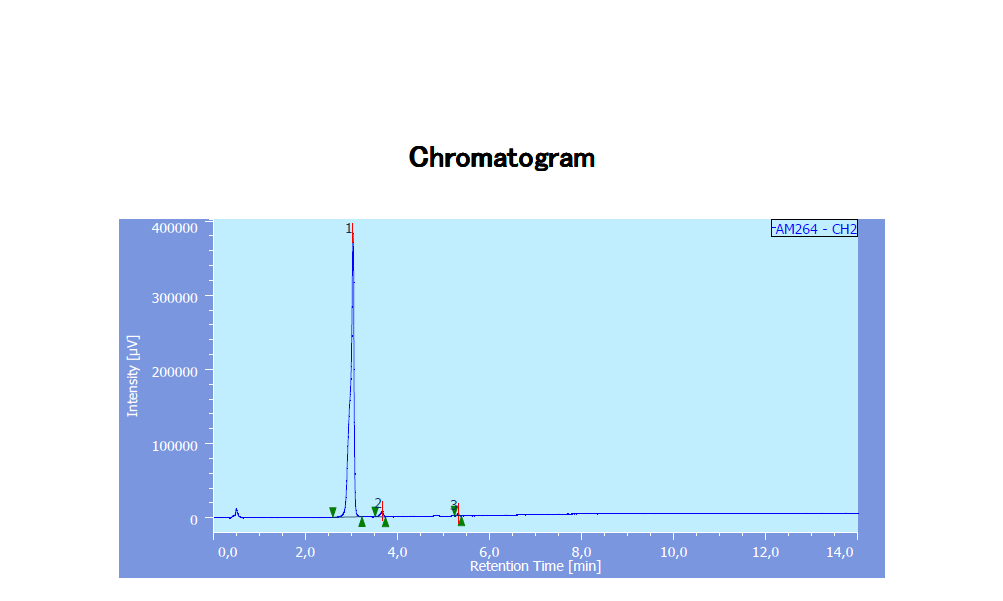


HPLC chromatogram of **18c**

HRMS spectra of **18c**

**22**


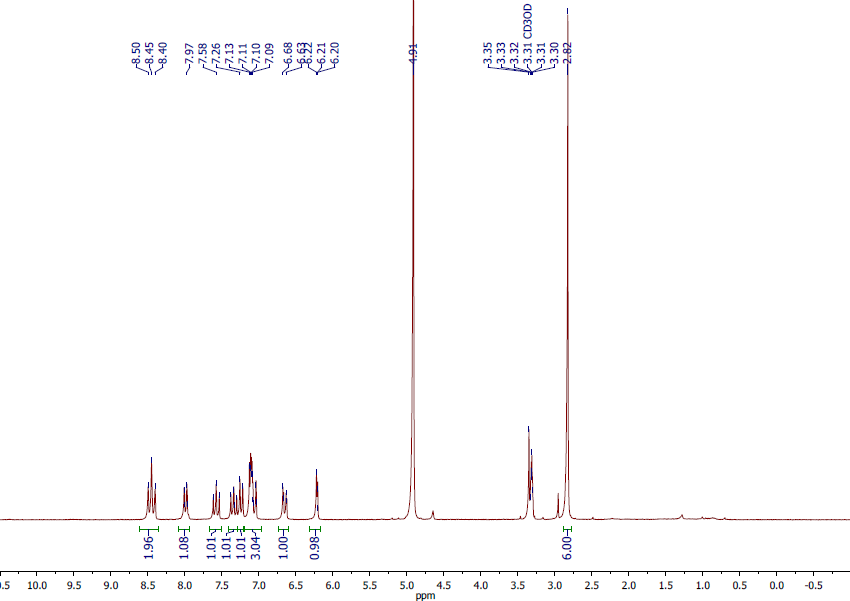


1H NMR spectra of **22**


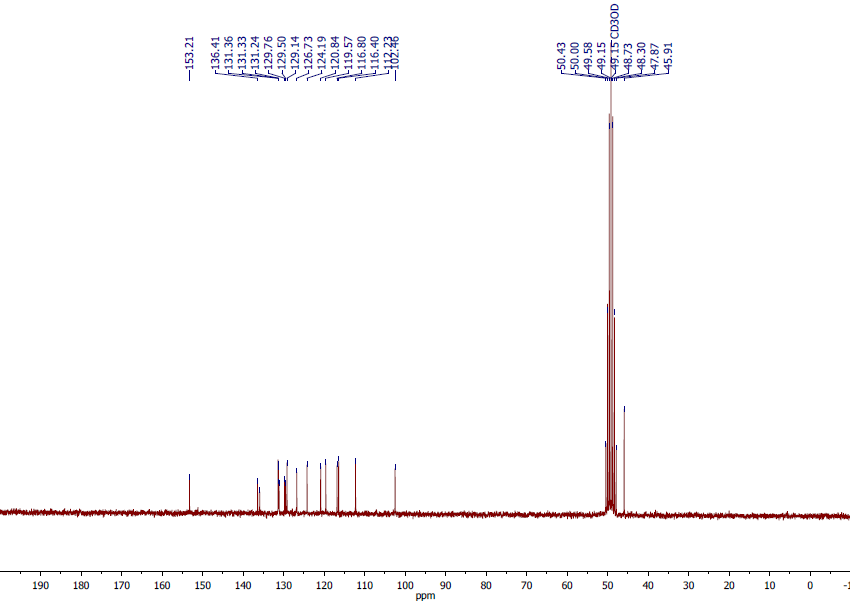


13C NMR spectra of **22**


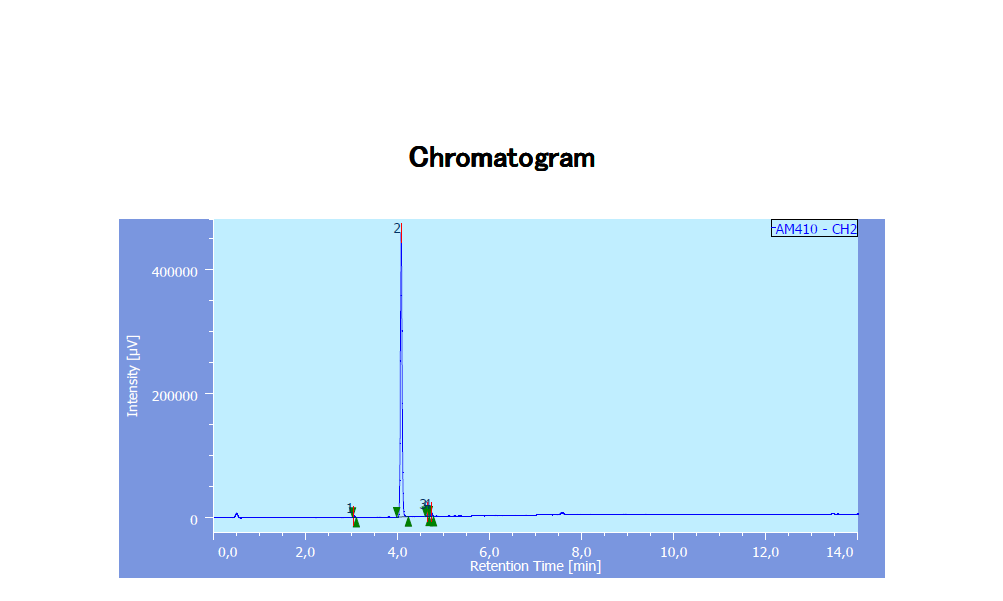


HPLC chromatogram of **22**

HRMS spectra of **22**

**23**


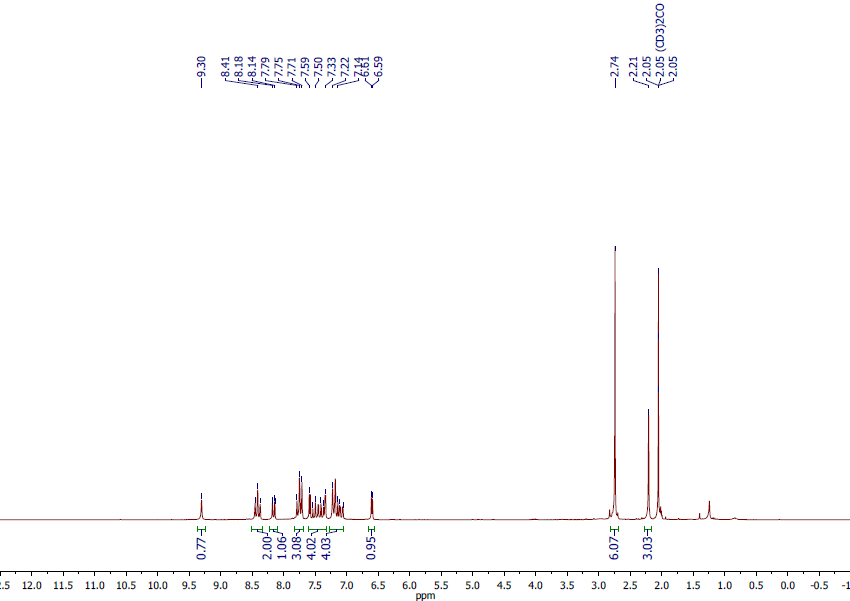


1H NMR spectra of **23**


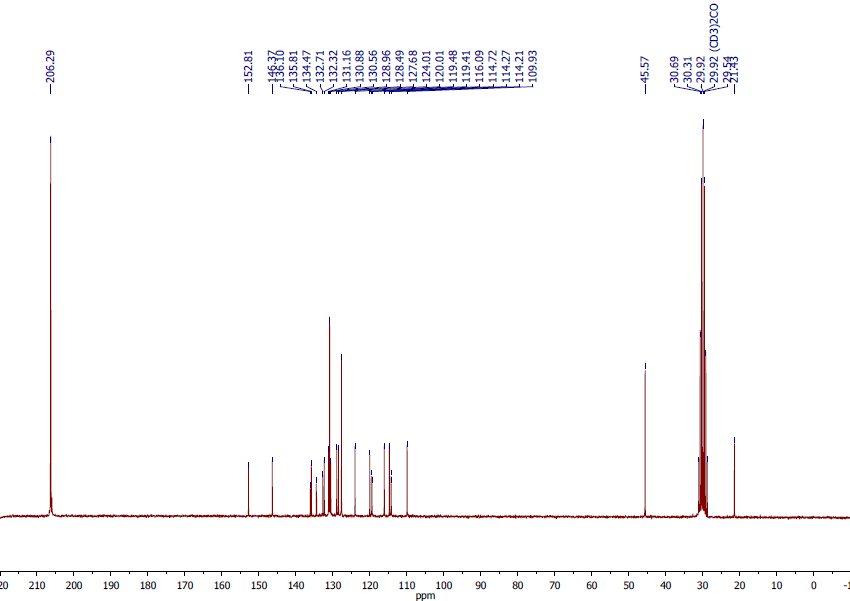


13C NMR spectra of **23**


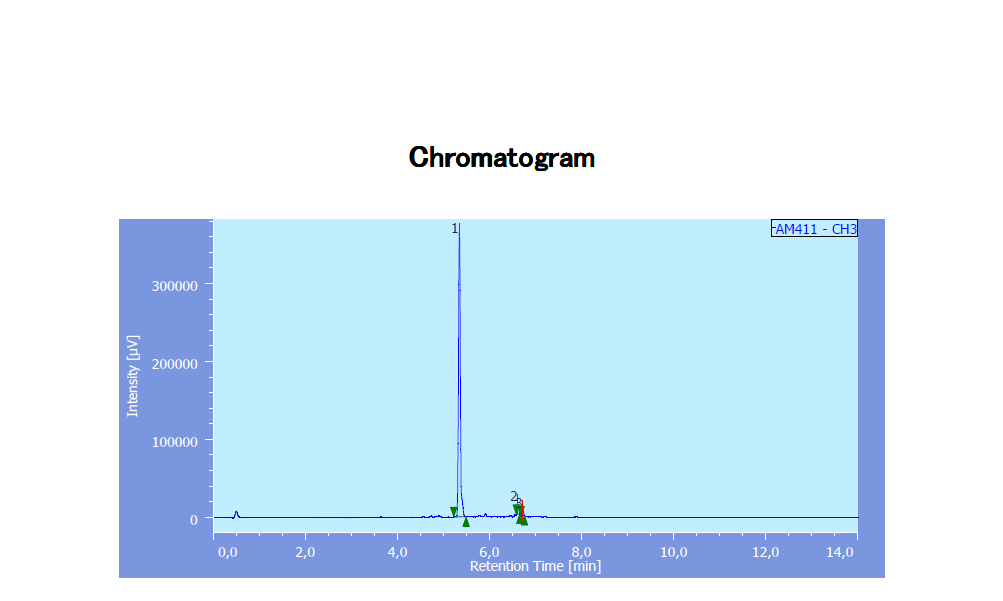


HPLC chromatogram of **23**

HRMS spectra of **23**

**Biological analysis**

|  | 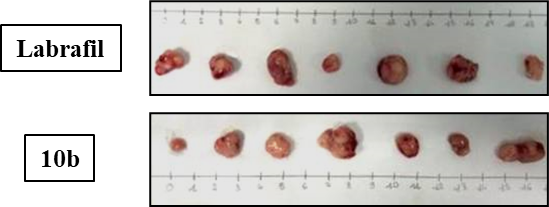 |
| --- | --- |

**Figure S1**. Average tumor weight removed from euthanized mice after 31 days of treatment with vehicle (Labrafil) and compound **10b**. Adapted with permission from *ref 11* (main article) Copyright (2016), American Chemical Society.
